# Supplementary material for: Biobased copolyesters from renewable resources: synthesis and crystallization kinetics of poly(propylene sebacate-co-isosorbide sebacate)
Source: Royal Society of Chemistry journal article supplement (doi:10.1039/c5ra13177d), 2015-01-01
Supplement: c5ra13177d1.pdf [file c5ra13177d1.pdf]

## Supplementary Information

# Biobased copolyesters from renewable resources: synthesis and crystallization kinetics of poly(propylene sebacate-co-isosorbide sebacate)

Cheng Zhou, Zhiyong Wei, Yang Yu, Yanshai Wang, Yang Li

State Key Laboratory of Fine Chemicals, Department of Polymer Science and Materials, School of Chemical Engineering, Dalian University of Technology, Dalian 116024, China  
Corresponding author. E-mail address: liyang@dlut.edu.cn (Y. Li)

### Figure Captions

**Fig.S1** DSC thermograms of isothermal crystallization at different temperatures: (a) P(PSe-co-11.7mol% IS), (b) P(PSe-co-19.1mol% IS)

**Fig. S2** Relative degree of crystallinity with time for isothermal crystallization at different temperatures: (a) P(PSe-co-11.7mol% IS), (b) P(PSe-co-19.1mol% IS)

**Fig. S3** Avrami plots of  $\ln[-\ln(1-X_t)]$  versus  $\ln t$  for isothermal crystallization: (a) P(PSe-co-11.7mol% IS), (b) P(PSe-co-19.1mol% IS)

**Fig. S4** DSC heating scans recorded at  $5\text{ }^\circ\text{C min}^{-1}$  of (a) P(PSe-co-11.7mol% IS) and (b) P(PSe-co-19.1mol% IS) after isothermal crystallization at indicated temperatures

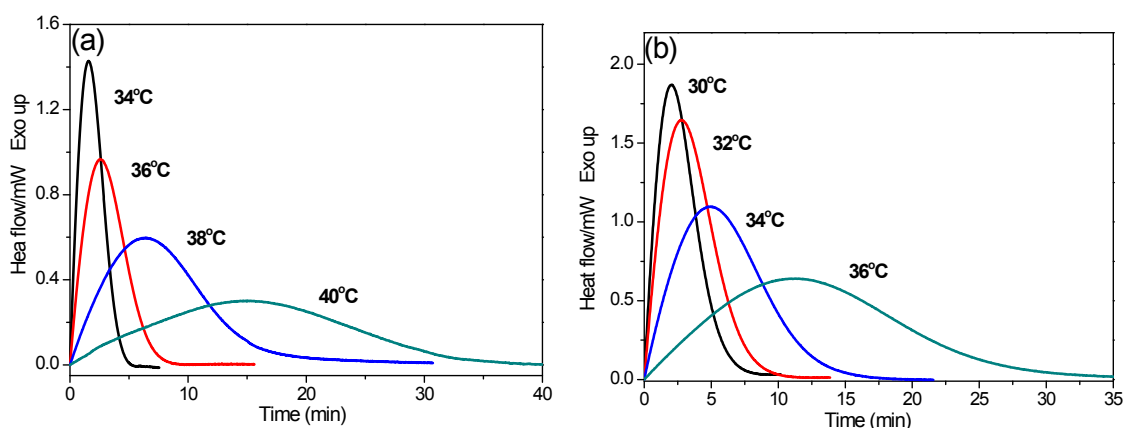

Fig. S1 DSC thermograms of isothermal crystallization at different temperatures: (a) P(PSe-co-11.7mol% IS), (b) P(PSe-co-19.1mol% IS)

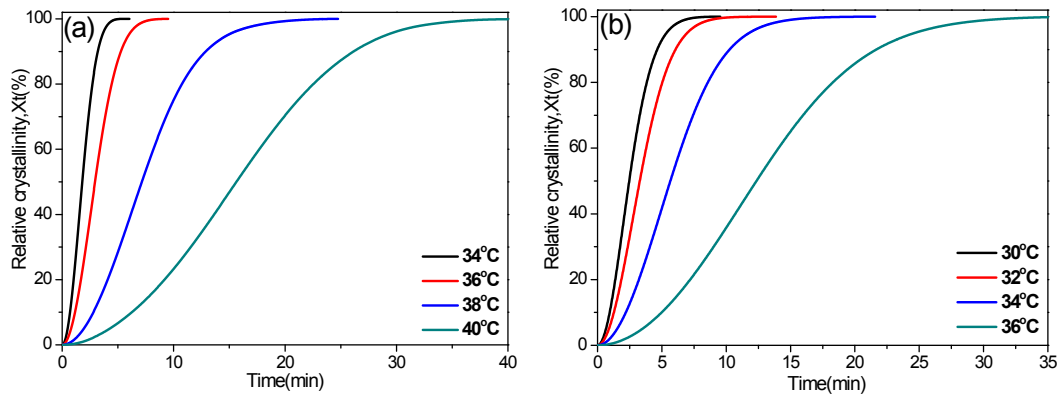

Fig. S2 Relative degree of crystallinity with time for isothermal crystallization at different temperatures: (a) P(PSe-co-11.7mol% IS), (b) P(PSe-co-19.1mol% IS)

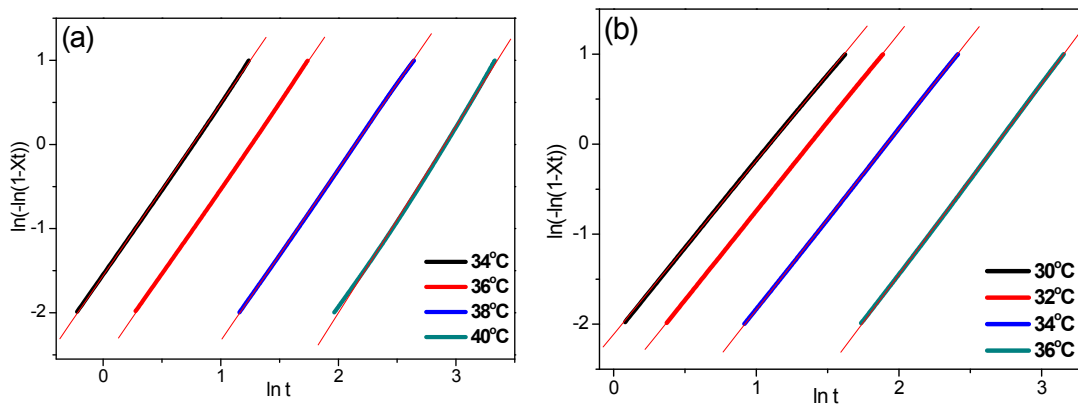

Fig. S3 Avrami plots of  $\ln[-\ln(1-X_t)]$  versus  $\ln t$  for isothermal crystallization: (a) P(PSe-co-11.7mol% IS), (b) P(PSe-co-19.1mol% IS)

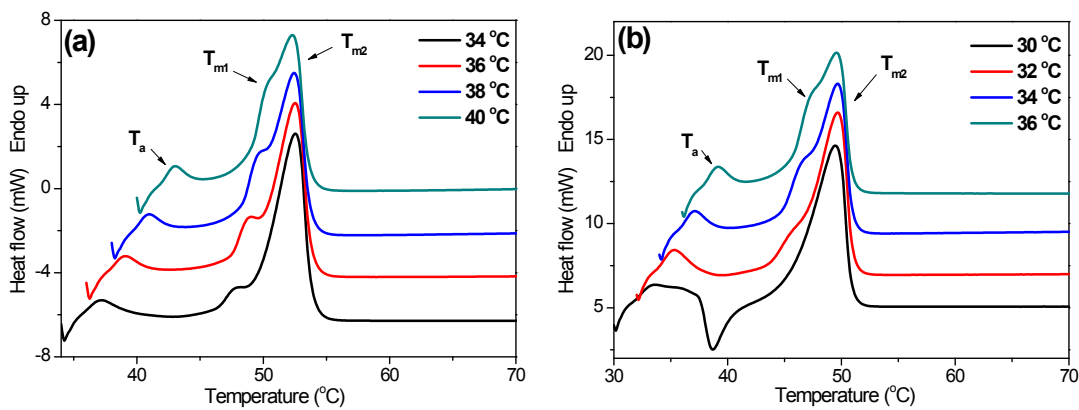

Fig. S4 DSC heating scans recorded at  $5\text{ °C min}^{-1}$  of (a) P(PSe-co-11.7mol% IS) and (b) P(PSe-co-19.1mol% IS) after isothermal crystallization at indicated temperatures
